# Supplementary material
Source: MDPI journal article supplement (https://www.mdpi.com/2073-4441/14/5/720)
Supplement: s1 [file s1]

## Article

# Efficacies of Nitrogen Removal and Comparisons of Microbial Communities in Full-Scale (Pre-Anoxic Systems) Municipal Water Resource Recovery Facilities at Low and High COD:TN Ratios

Supaporn Phanwilai <sup>1</sup>, Pongsak (Lek) Noophan <sup>2,\*</sup>, Chi-Wang Li <sup>3</sup> and Kwang-Ho Choo <sup>4</sup>

<sup>1</sup> Department of Knowledge of The Land for Sustainable, School of Integrated Science, Kasetsart University, Bangkok 10900 Thailand; supaporn.phan@ku.th

<sup>2</sup> Department of Environmental Engineering, Faculty of Engineering, Kasetsart University, Bangkok 10900 Thailand

<sup>3</sup> Department of Water Resources and Environmental Engineering, Tamkang University, New Taipei City 25137, Taiwan; chiwang@mail.tku.edu.tw

<sup>4</sup> Department of Environmental Engineering, Kyungpook National University, 80 Daehak-ro, Buk-gu, Daegu 702-701, Korea; chookh@knu.ac.kr

\* Correspondence: pongsak.n@ku.ac.th; Tel: +66-2797-0999 (ext 1008)

**Abstract:** At a low COD:TN ratio ( $\leq 5$ ) in influent, maintaining a longer HRT ( $\geq 9$  h) and longer SRT ( $\geq 30$  d) are suggested to improve higher N removal efficiency in case of operation at low DO (Dissolved oxygen) level ( $0.9 \pm 0.2$  mg-O<sub>2</sub>/L). However, in case of operation at high DO level ( $4.0 \pm 0.5$  mg-O<sub>2</sub>/L), short HRT (1 h) and typical SRT (17 d) make it possible to achieve nitrogen removal. On the other hand, at a high COD:TN ratio ( $\geq 8.4$ ), a typical HRT (9–15 h), SRT (12–19 d), and DO level ( $1.3$ – $2.6$  mg-O<sub>2</sub>/L) would be applied. Microbial distribution analysis showed an abundance of AOA (Ammonia-oxidizing archaea) under conditions of low DO ( $\leq 0.9$  mg-O<sub>2</sub>/L). *Nitrosomonas* sp. are mostly found in the all investigated water resource recovery facilities (WRRFs). *Nitrospira* sp. are only found under operating conditions of longer SRT for WRRFs with a low COD:TN ratio. In comparison between abundances of *Nitrobacter* sp. and *Nitrospira* sp., abundances of *Nitrobacter* sp. are proportional to low DO concentration rather than abundance of *Nitrospira* sp. A predominance of *nosZ*-type denitrifiers were found at low DO level. Abundance of denitrifiers by using *nirS* genes showed an over-abundance of denitrifiers by using *nirK* genes at low and high COD:TN ratios.

**Keywords:** pre-anoxic; COD:TN; nitrogen removal; microbial communities

**Citation:** Phanwilai, S.; Noophan, P.; Li, C.-W.; Choo, K.-H. Efficacies of Nitrogen Removal and Comparisons of Microbial Communities in Full-Scale (Pre-Anoxic Systems) Municipal Water Resource Recovery Facilities at Low and High COD:TN Ratios. *Water* **2022**, *14*, 720. <https://doi.org/10.3390/w14050720>

Academic Editors: Laura Bulgariu and Marco Guida

Received: 1 January 2022

Accepted: 18 February 2022

Published: 24 February 2022

**Publisher's Note:** MDPI stays neutral with regard to jurisdictional claims in published maps and institutional affiliations.

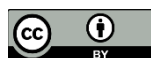

**Copyright:** © 2022 by the authors. Licensee MDPI, Basel, Switzerland. This article is an open access article distributed under the terms and conditions of the Creative Commons Attribution (CC BY) license (<https://creativecommons.org/licenses/by/4.0/>).

**Table S1.** Efficiency, slope and  $r^2$  values of individual real-time PCR assays.

| Target group | Target gene                                | Primer set     | Linearity range                  | Efficiency |       |       |
|--------------|--------------------------------------------|----------------|----------------------------------|------------|-------|-------|
|              |                                            |                |                                  | %          | Slope | $r^2$ |
| All bacteria | EUB                                        | 338F/518R      | 10 <sup>2</sup> –10 <sup>9</sup> | 106.1      | −3.1  | 0.993 |
| AOA          | Ammonium monooxygenase ( <i>amoA</i> )     | Arch-amoAF/AR  | 10 <sup>1</sup> –10 <sup>8</sup> | 102.4      | −3.5  | 0.999 |
| AOB          | Ammonium monooxygenase ( <i>amoA</i> )     | amoA1F/2R      | 10 <sup>1</sup> –10 <sup>8</sup> | 99.6       | −3.4  | 0.993 |
| NOB          | 16S rRNA <i>Nitrobacter</i> sp.            | Nb1000F/1387R  | 10 <sup>1</sup> –10 <sup>8</sup> | 105.4      | −3.2  | 0.997 |
|              | 16S rRNA <i>Nitrospira</i> sp.             | NSR1113F/1264R | 10 <sup>1</sup> –10 <sup>8</sup> | 104.4      | −3.0  | 0.996 |
|              | Nitrite reductase ( <i>nirK</i> )          | nirScd3AF/R3cd | 10 <sup>1</sup> –10 <sup>8</sup> | 99.8       | −3.3  | 0.993 |
| DNB          | Nitrite reductase ( <i>nirS</i> )          | nirKF1aCu/R3Cu | 10 <sup>1</sup> –10 <sup>8</sup> | 98.7       | −3.3  | 0.999 |
|              | N <sub>2</sub> O reductase ( <i>nosZ</i> ) | nosZ2F/Z2R     | 10 <sup>1</sup> –10 <sup>8</sup> | 98.3       | −3.3  | 0.995 |

**Table S2.** Overall gene abundance of the with and without pre-anaerobic plants by multiple mean comparisons of one-way ANOVA test.

| Process           | Target, copies-DNA/g-MLVSS |           |                      |          |                      |            |                      |          |                      |          |                      |          |                      |          |                       |           |
|-------------------|----------------------------|-----------|----------------------|----------|----------------------|------------|----------------------|----------|----------------------|----------|----------------------|----------|----------------------|----------|-----------------------|-----------|
|                   | EUB                        |           | <i>amoA</i> -AOA     |          | <i>amoA</i> -AOB     |            | NSR                  |          | Nitrob               |          | <i>nirS</i>          |          | <i>nirK</i>          |          | <i>nosZ</i>           |           |
|                   | Avg                        | Group     | Avg                  | Group    | Avg                  | Group      | Avg                  | Group    | Avg                  | Group    | Avg                  | Group    | Avg                  | Group    | Avg                   | Group     |
| w/o pre-anaerobic | <b>L1</b>                  |           |                      |          |                      |            |                      |          |                      |          |                      |          |                      |          |                       |           |
|                   | Anx 4.16×10 <sup>11</sup>  | <i>a</i>  | 6.19×10 <sup>7</sup> | <i>b</i> | 6.10×10 <sup>6</sup> | <i>a</i>   | 1.38×10 <sup>6</sup> | <i>c</i> | 8.09×10 <sup>8</sup> | <i>a</i> | 4.21×10 <sup>9</sup> | <i>a</i> | 5.07×10 <sup>7</sup> | <i>c</i> | 5.12×10 <sup>10</sup> | <i>a</i>  |
|                   | Aer 4.31×10 <sup>11</sup>  | <i>a</i>  | 8.89×10 <sup>7</sup> | <i>a</i> | 6.91×10 <sup>6</sup> | <i>a</i>   | 3.21×10 <sup>6</sup> | <i>c</i> | 7.39×10 <sup>8</sup> | <i>a</i> | 4.02×10 <sup>9</sup> | <i>a</i> | 4.33×10 <sup>7</sup> | <i>c</i> | 8.23×10 <sup>9</sup>  | <i>c</i>  |
|                   | <b>H1</b>                  |           |                      |          |                      |            |                      |          |                      |          |                      |          |                      |          |                       |           |
| w/- pre-anaerobic | Anx 1.67×10 <sup>11</sup>  | <i>b</i>  | 1.57×10 <sup>6</sup> | <i>c</i> | 1.12×10 <sup>6</sup> | <i>cde</i> | 3.11×10 <sup>6</sup> | <i>c</i> | 2.39×10 <sup>8</sup> | <i>c</i> | 4.56×10 <sup>8</sup> | <i>c</i> | 6.12×10 <sup>7</sup> | <i>c</i> | 2.14×10 <sup>10</sup> | <i>b</i>  |
|                   | Aer 6.28×10 <sup>10</sup>  | <i>c</i>  | 6.06×10 <sup>6</sup> | <i>c</i> | 1.65×10 <sup>6</sup> | <i>cd</i>  | 2.72×10 <sup>6</sup> | <i>c</i> | 3.85×10 <sup>8</sup> | <i>b</i> | 6.17×10 <sup>7</sup> | <i>c</i> | 1.08×10 <sup>7</sup> | <i>d</i> | 3.95×10 <sup>9</sup>  | <i>cd</i> |
|                   | <b>L2</b>                  |           |                      |          |                      |            |                      |          |                      |          |                      |          |                      |          |                       |           |
|                   | Ana 6.73×10 <sup>9</sup>   | <i>d</i>  | 2.29×10 <sup>5</sup> | <i>c</i> | 3.39×10 <sup>5</sup> | <i>de</i>  | 1.03×10 <sup>8</sup> | <i>c</i> | 1.34×10 <sup>7</sup> | <i>d</i> | 5.41×10 <sup>7</sup> | <i>c</i> | 1.24×10 <sup>7</sup> | <i>d</i> | 1.26×10 <sup>7</sup>  | <i>d</i>  |
| w/- pre-anaerobic | Anx 7.90×10 <sup>9</sup>   | <i>d</i>  | 5.05×10 <sup>4</sup> | <i>c</i> | 2.29×10 <sup>5</sup> | <i>e</i>   | 6.21×10 <sup>7</sup> | <i>c</i> | 1.08×10 <sup>7</sup> | <i>d</i> | 5.86×10 <sup>7</sup> | <i>c</i> | 5.73×10 <sup>7</sup> | <i>c</i> | 1.55×10 <sup>7</sup>  | <i>d</i>  |
|                   | Aer 4.85×10 <sup>9</sup>   | <i>d</i>  | 1.56×10 <sup>5</sup> | <i>c</i> | 3.35×10 <sup>5</sup> | <i>de</i>  | 6.97×10 <sup>7</sup> | <i>c</i> | 7.46×10 <sup>6</sup> | <i>d</i> | 5.19×10 <sup>7</sup> | <i>c</i> | 4.65×10 <sup>7</sup> | <i>c</i> | 1.03×10 <sup>7</sup>  | <i>d</i>  |
|                   | <b>H2</b>                  |           |                      |          |                      |            |                      |          |                      |          |                      |          |                      |          |                       |           |
|                   | Ana 3.99×10 <sup>10</sup>  | <i>cd</i> | 1.95×10 <sup>5</sup> | <i>c</i> | 3.36×10 <sup>6</sup> | <i>b</i>   | 6.21×10 <sup>8</sup> | <i>a</i> | 1.73×10 <sup>7</sup> | <i>d</i> | 1.35×10 <sup>9</sup> | <i>b</i> | 2.27×10 <sup>8</sup> | <i>a</i> | 3.71×10 <sup>8</sup>  | <i>d</i>  |
| w/- pre-anaerobic | Anx 3.91×10 <sup>10</sup>  | <i>cd</i> | 3.81×10 <sup>5</sup> | <i>c</i> | 1.27×10 <sup>6</sup> | <i>cde</i> | 5.05×10 <sup>8</sup> | <i>b</i> | 1.66×10 <sup>7</sup> | <i>d</i> | 1.12×10 <sup>9</sup> | <i>b</i> | 1.37×10 <sup>8</sup> | <i>b</i> | 2.31×10 <sup>8</sup>  | <i>d</i>  |
|                   | Aer 3.48×10 <sup>10</sup>  | <i>cd</i> | 1.39×10 <sup>5</sup> | <i>c</i> | 1.76×10 <sup>6</sup> | <i>c</i>   | 4.05×10 <sup>8</sup> | <i>b</i> | 1.73×10 <sup>7</sup> | <i>d</i> | 9.60×10 <sup>8</sup> | <i>b</i> | 1.39×10 <sup>8</sup> | <i>b</i> | 2.23×10 <sup>8</sup>  | <i>d</i>  |

**Remark:** An italic letter is multiple mean comparisons significantly grouping by pairwise comparisons of plant zone (show small letter: *a* to *e*), the means that do not share a letter refer significantly different at  $p > 0.05$ .
